# Supplementary material for: Therapeutic inhibition of GAS6-AS1/YBX1/MYC axis suppresses cell propagation and disease progression of acute myeloid leukemia
Source: Springer Nature journal article supplement (doi:10.1186/s13046-021-02145-9), 2021-11-09
Supplement: MOESM1 [file 19848638]

Table S1. Clinical characteristics of the IHUH cohort.

| <b>Variable</b> | <b>N (%)</b> |
|-----------------|--------------|
| <b>Gender</b>   |              |
| Male            | 41 (53.9%)   |
| Female          | 35 (46.1%)   |
| <b>Age</b>      |              |
| ≤60             | 52 (68.4%)   |
| >60             | 24 (31.6%)   |
| <b>Subtype</b>  |              |
| M0              | 4 (5.3%)     |
| M1              | 20 (26.3%)   |
| M2              | 26 (34.2%)   |
| M4              | 16 (21.1%)   |
| M5              | 7 (9.2%)     |
| M6              | 3 (3.9%)     |
| M7              | 0 (0.0%)     |

IHUH, Institute of Hematology of Union Hospital.

**Table S2. Primer sets used for qRT-PCR, RIP, RT-PCR, probe, and ChIP**

| Primer set     | Primers | Sequence                       | Application    | Product length (bp) |
|----------------|---------|--------------------------------|----------------|---------------------|
| GAS6-AS1       | Forward | 5'-CTTGCTCCTGCCGTGTAAGA-3'     | qRT-PCR, RIP   | 160                 |
|                | Reverse | 5'-TGTCACACCGGTAGGAATGC-3'     |                |                     |
| GAS6-AS1       | Forward | 5'-GCTCCTGCCGTGTAAGAAGT-3'     | Probe          | 154                 |
|                | Reverse | 5'-CACACCGGTAGGAATGCAGT-3'     |                |                     |
| GAPDH          | Forward | 5'-GGGCTGCTTTTAACTCTGGT-3'     | qRT-PCR, Probe | 198                 |
|                | Reverse | 5'-TGATTTTGGAGGGATCTCGC-3'     |                |                     |
| U6             | Forward | 5'-AAAGCAAATCATCGGACGACC-3'    | qRT-PCR, Probe | 181                 |
|                | Reverse | 5'-GTACAACACATTGTTTCCTCGGA-3'  |                |                     |
| HOTAIR         | Forward | 5'-AACTCTGACTCGCCTGTGCTCT-3'   | RT-PCR         | 233                 |
|                | Reverse | 5'-CTTCTAAATCCGTTCCATTCCA-3'   |                |                     |
| IL1R1          | Forward | 5'-ATGAAATTGATGTTTCGTCCCTGT-3' | qRT-PCR        | 184                 |
|                | Reverse | 5'-ACCACGCAATAGTAATGTCCTG-3'   |                |                     |
| SRC            | Forward | 5'-TTTGGCAAGATCACTAGACGGG-3'   | qRT-PCR        | 111                 |
|                | Reverse | 5'-GAGGCAGTAGGCACCTTTTGT-3'    |                |                     |
| RAB27B         | Forward | 5'-TAGACTTTCGGGAAAAACGTGTG-3'  | qRT-PCR        | 192                 |
|                | Reverse | 5'-AGAAGCTCTGTTGACTGGTGA-3'    |                |                     |
| MYC            | Forward | 5'-GTCAAGAGGCGAACACACAAC-3'    | qRT-PCR        | 162                 |
|                | Reverse | 5'-TTGGACGGACAGGATGTATGC-3'    |                |                     |
| YBX1           | Forward | 5'-GGGGACAAGAAGGTCATCGC-3'     | qRT-PCR        | 155                 |
|                | Reverse | 5'-CGAAGGTA CTTCTGGGGTTA-3'    |                |                     |
| $\beta$ -actin | Forward | 5'-TGCCCATCTACGAGGGGTATG-3'    | qRT-PCR        | 156                 |
|                | Reverse | 5'-TCTCCTTAATGTCACGCACGATTT-3' |                |                     |
| IL1R1          | Forward | 5'-TATTTCTCAAGTTACCCAGGCACA-3' | ChIP           | 162                 |
|                | Reverse | 5'-GGAGCCGTCAATGAAGTTTT-3'     |                |                     |
| SRC            | Forward | 5'-CAGGCCAGGTGGTGGTTAGG-3'     | ChIP           | 155                 |
|                | Reverse | 5'-CCCAACCCACCCACCTTCTAC-3'    |                |                     |
| RAB27B         | Forward | 5'-GTTGGGACTTGCAGACACGC-3'     | ChIP           | 174                 |
|                | Reverse | 5'-GCTACTTATCTCCTCCAACCTGTG-3' |                |                     |

**Table S3. The sequence of the shRNAs to diminish gene expression.**

| <b>sh-RNA</b>    | <b>Sequence</b>                                                       |
|------------------|-----------------------------------------------------------------------|
| sh-GAS6-AS1 #1 F | 5'-CCGGGCCTGAACTAGAGAAATGATTCTCGAGAATCATTCTCTAG<br>TTCAGGCTTTTTG-3'   |
| sh-GAS6-AS1 #1 R | 5'-AATTCAAAAAGCCTGAACTAGAGAAATGATTCTCGAGTCATTCT<br>CTAGTCAGGCTT-3'    |
| sh-GAS6-AS1 #2 F | 5'-CCGGCTGGCCTGAACTAGAGAAATTCTCGAGTTTCTCTAGTTCAG<br>GCCAGTTTTTTG-3'   |
| sh-GAS6-AS1 #2 R | 5'-AATTCAAAAAGCCTGAACTAGAGAAATTCTCGAGTTTCTCTA<br>GTTTCAGGCCAGTT-3'    |
| sh-YBX1 #1 F     | 5'-CCGGCGGCAATGAAGAAGATAAATTCTCGAGTTTATCTTCTTCAT<br>TGCCGTTTTTTG-3'   |
| sh-YBX1 #1 R     | 5'-AATTCAAAAACGGCAATGAAGAAGATAAATTCTCGAGTTTATCT<br>CTTCATTGCCGTT-3'   |
| sh-YBX1 #2 F     | 5'-CCGGCTGCCATAAAGAAGAATAAATTCTCGAGTTATTCTTCTTAT<br>GGCAGTTTTTTG-3'   |
| sh-YBX1 #2 R     | 5'-AATTCAAAAAGCCTGAACTAGAGAAATTCTCGAGTTATTCT<br>CTTATGGCAGTT-3'       |
| sh-MYC #1 F      | 5'-CCGGCCACCCATAAATCAATAAATTCTCGAGTTTATTGATTTATG<br>GGTGGTTTTTTG-3'   |
| sh-MYC #1 R      | 5'-AATTCAAAAACCCACCCATAAATCAATAAATTCTCGAGTTTATTGA<br>TTTATGGGTGGTT-3' |
| sh-MYC #2 F      | 5'-CCGGGAGGATATCTGGAAGAAATTTCTCGAGATTTCTTCCAGAT<br>ATCCTTTTTTTG-3'    |
| sh-MYC #2 R      | 5'-AATTCAAAAAGAGGATATCTGGAAGAAATTTCTCGAGATTTCTT<br>CCAGATATCCTCTT-3'  |

**Table S4. Primer pairs for luciferase vector construction.**

| <b>Primer set</b> | <b>Sequence</b>                         | <b>Location</b> |
|-------------------|-----------------------------------------|-----------------|
| IL1R1 (F)         | 5'-CGGGGTACCTATTTCTCAAGTTACCCAGGCACA-3' | -424 – + 87     |
| IL1R1 (R)         | 5'-CCGCTCGAGGTCGAGACAAATGCCTTGGA-3'     |                 |
| RAB27B (F)        | 5'-CGGGGTACCACAGCGCCCTGGGCTCTTTG-3'     | -280 – + 241    |
| RAB27B (R)        | 5'-CCGCTCGAGCCGCCTTCCCAACTCACCAG-3'     |                 |

**Table S5. Mass spectrometry analysis of proteins pulled down by GAS6-AS1**

---

|         |         |         |         |
|---------|---------|---------|---------|
| ABCF1   | FBL     | NOP56   | SFPQ    |
| ABCF2   | FERMT3  | PHB2    | SRP14   |
| ALDOA   | HEXIM1  | PIP4K2A | SRP9    |
| AP2M1   | HSP90B1 | PIP4K2C | TAOK1   |
| ARRB2   | HSPA5   | PLEC    | TAOK2   |
| BMS1    | HSPA8   | PRPF40A | TAOK3   |
| BTK     | HSPB1   | PRSS3P2 | TCP1    |
| CFL1    | HSPD1   | RAB11A  | TRMT6   |
| CMAS    | LDHA    | RPL18A  | TRMT61A |
| CSNK2A1 | LDHB    | RPL23   | VANGL1  |
| CSNK2B  | LMNA    | RPL3    | YBX1    |
| CTSG    | MCM7    | RPL32   |         |
| DDX21   | MSN     | RPL35A  |         |
| DDX3Y   | MTHFD1  | RPL36   |         |
| DKC1    | MYO1G   | RPL7    |         |
| DRG1    | NACA    | RPL9    |         |
| DSG1    | NCL     | RPS23   |         |
| DSP     | NHP2    | RPS3A   |         |
| EIF1AX  | NONO    | RPS9    |         |
| EIF2S3  | NOP10   | SEPTIN7 |         |

---

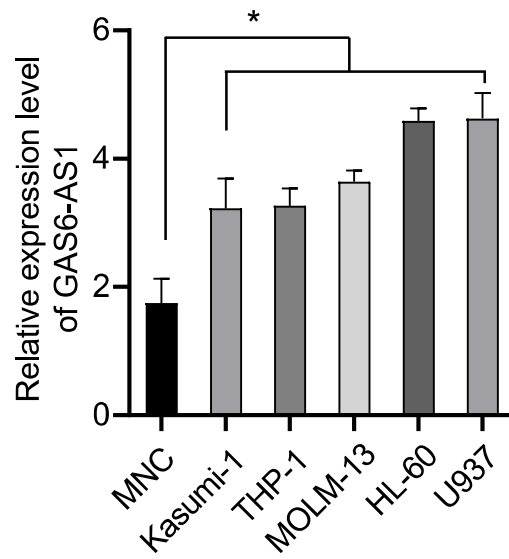

Figure S1. Real-time qRT-PCR (normalized to  $\beta$ -actin,  $n = 4$ ) showing the expression of GAS6-AS1 in AML cell lines and mononuclear cells (MNC) from healthy donors. Data are shown as mean  $\pm$  s.e.m. (error bars).  $*P < 0.05$ .

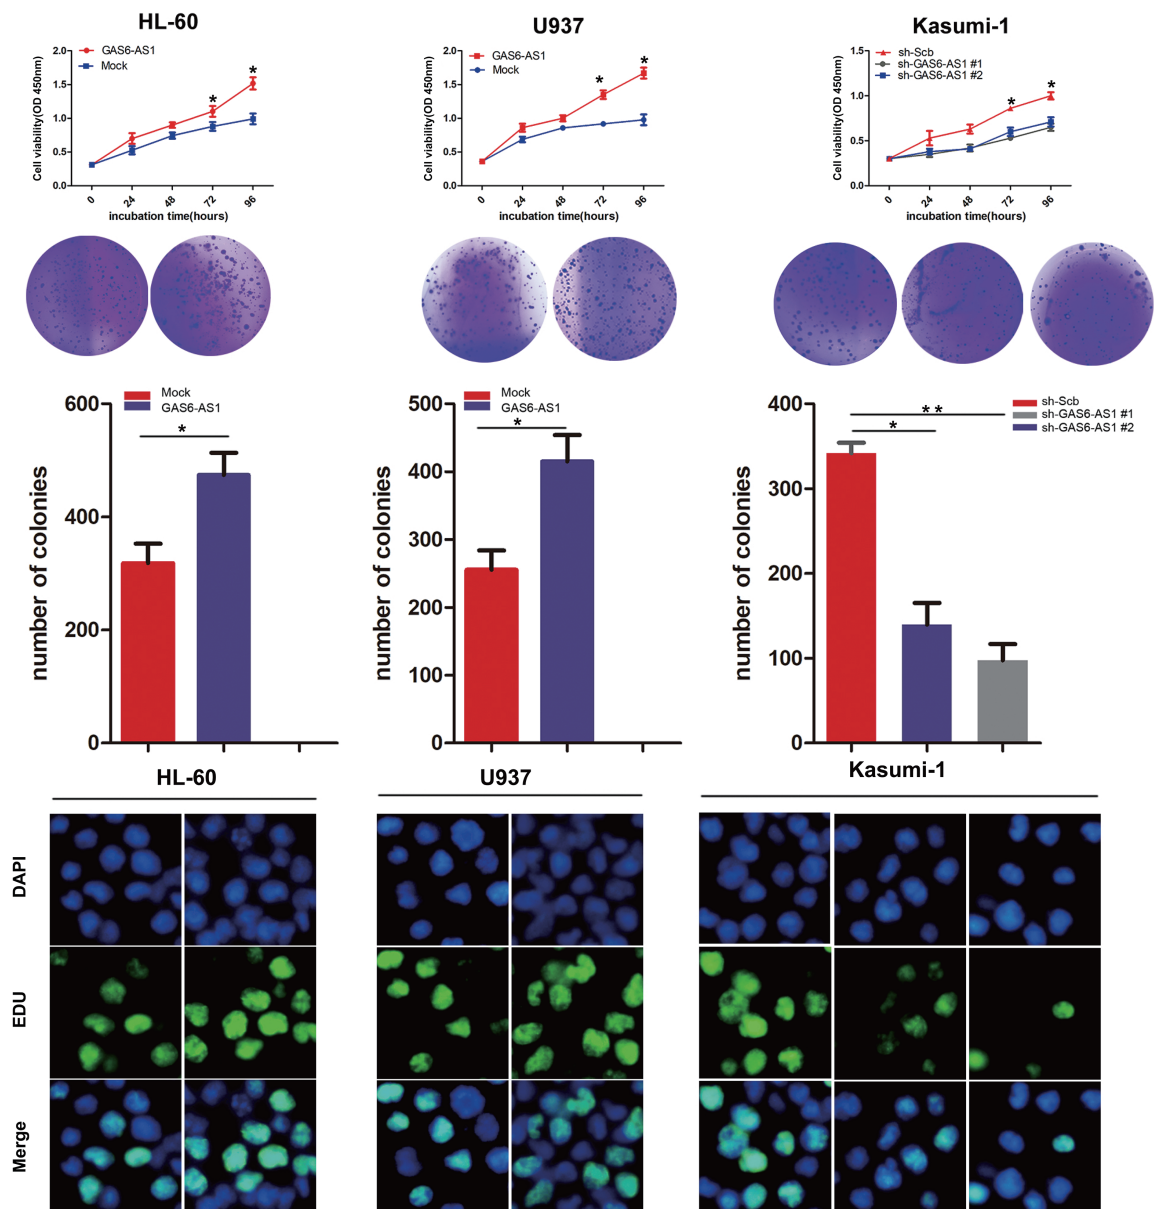

**Figure S2. GAS6-AS1 promotes leukemia cell proliferation in vitro and vivo.** (A) CCK-8 assays detecting cell proliferation of HL-60, U937 and Kasumi-1 cells following transfection-mediated GAS6-AS1 overexpression or knockdown. (B-C) Colony-forming assays detecting cell proliferation of HL-60, U937 and Kasumi-1 cells. (D) EdU assays examining cell proliferation after transfection. Data were depicted as mean  $\pm$  s.e.m.,  $*P < 0.05$ .

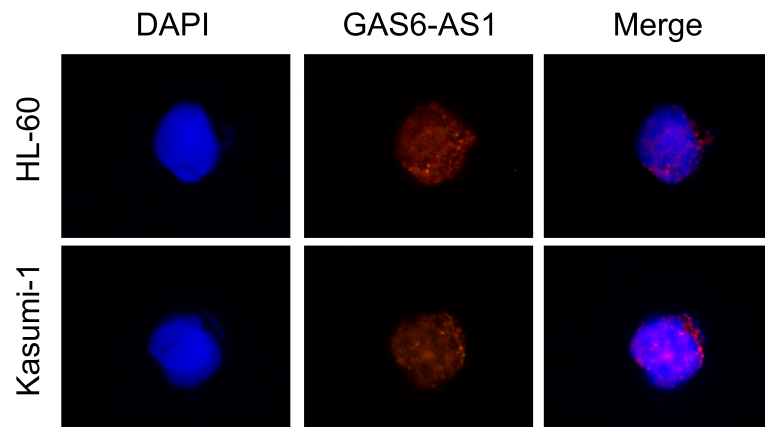

Figure S3. FISH analysis of GAS6-AS1 in HL-60 and Kasumi-1 cells using a biotin-labeled RNA probe. Nuclei were stained with DAPI.



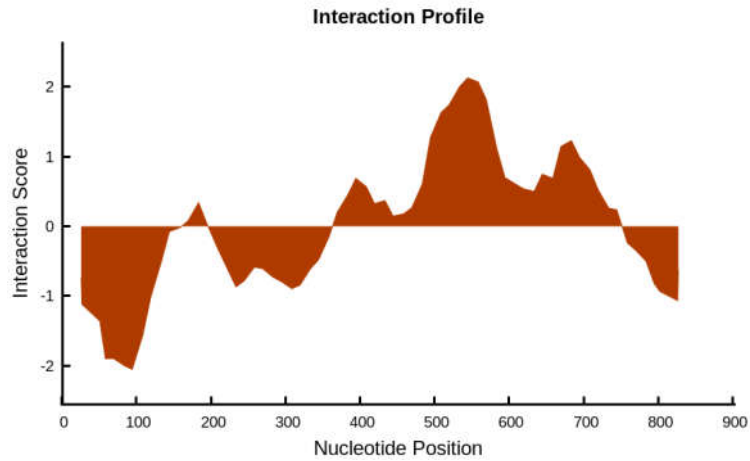

| #  | Protein region | RNA region | Interaction Propensity | Discriminative Power | Normalized Score |
|----|----------------|------------|------------------------|----------------------|------------------|
| 1  | 249-300        | 526-577    | 16.34                  | 45                   | 3.42             |
| 2  | 249-300        | 527-578    | 16.04                  | 45                   | 3.34             |
| 3  | 249-300        | 677-728    | 15.07                  | 42                   | 3.10             |
| 4  | 174-225        | 526-577    | 14.42                  | 40                   | 2.93             |
| 5  | 174-225        | 677-728    | 14.33                  | 40                   | 2.91             |
| 6  | 174-225        | 527-578    | 14.18                  | 40                   | 2.87             |
| 7  | 249-300        | 576-627    | 13.62                  | 37                   | 2.73             |
| 8  | 249-300        | 577-628    | 13.19                  | 37                   | 2.62             |
| 9  | 126-177        | 526-577    | 13.12                  | 37                   | 2.60             |
| 10 | 249-300        | 152-203    | 12.88                  | 35                   | 2.54             |
| 11 | 126-177        | 527-578    | 12.85                  | 35                   | 2.54             |
| 12 | 249-300        | 401-452    | 12.83                  | 35                   | 2.53             |
| 13 | 74-125         | 526-577    | 12.65                  | 35                   | 2.48             |
| 14 | 174-225        | 577-628    | 12.57                  | 35                   | 2.46             |
| 15 | 249-300        | 676-727    | 12.46                  | 35                   | 2.44             |
| 16 | 126-177        | 677-728    | 12.43                  | 35                   | 2.43             |
| 17 | 74-125         | 527-578    | 12.37                  | 35                   | 2.41             |
| 18 | 174-225        | 576-627    | 12.31                  | 35                   | 2.40             |
| 19 | 174-225        | 552-603    | 12.31                  | 35                   | 2.40             |
| 20 | 249-300        | 652-703    | 12.29                  | 35                   | 2.39             |

Figure S4. GAS6-AS1 physically interacts with YBX1 protein. The overall interaction propensity of GAS6-AS1 and YBX1 protein was predicted by catRAPID.

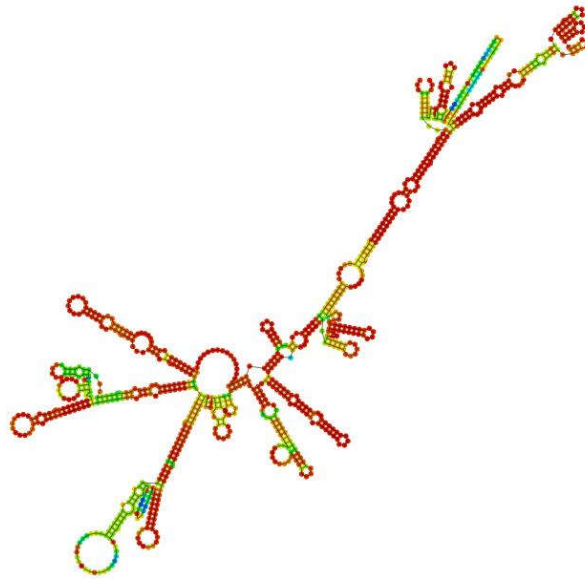

Figure S5. The secondary structure of GAS6-AS1 predicted by RNAfold webserver.

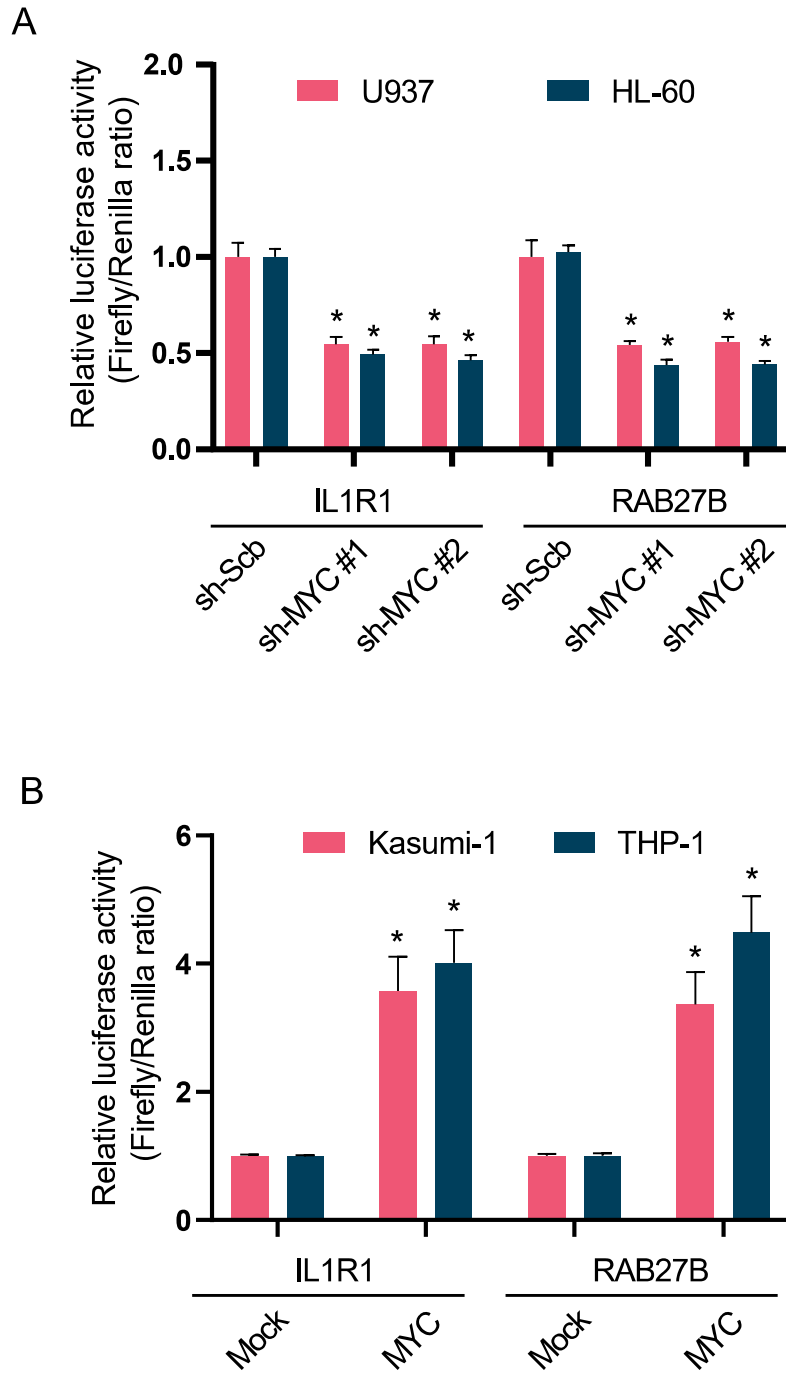

Figure S6. Dual luciferase reporter assays demonstrating the MYC enrichment and promoter activity of IL1R1 and RAB27B in AML cells stably transfected with sh-Scb, sh-MYC #1, sh-MYC #2, mock, or MYC (n = 4). Data are shown as mean  $\pm$  s.e.m. (error bars). \* $P < 0.05$ .

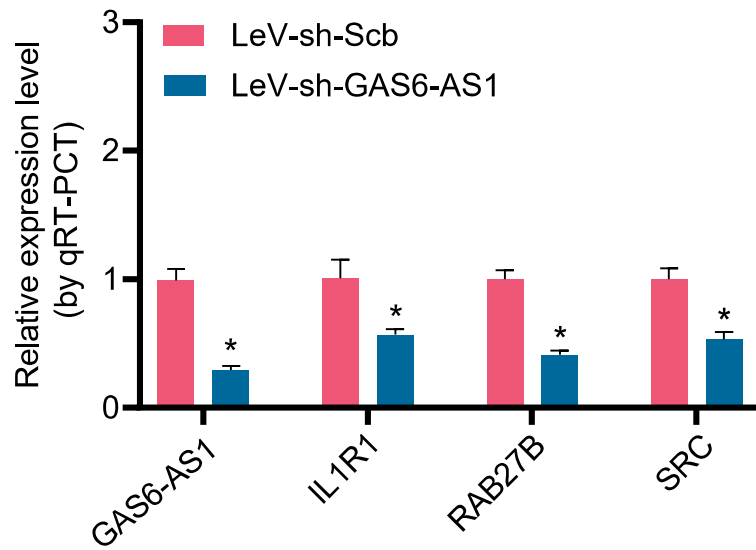

Figure S7. Real-time qRT-PCR (normalized to  $\beta$ -actin) indicating the expression of GAS6-AS1 and its target genes in xenograft tumors established by subcutaneous implantation of U937 cells into both dorsal flanks of each NOD-SCID mouse ( $n=5$  per group) that received intratumoral injection of LeV-sh-Scb or LeV-sh-GAS6-AS1 #1. Data are shown as mean  $\pm$  s.e.m. (error bars).  $*P < 0.05$ .
